# Supplementary material
Source: PubMed Central journal article supplement (PMC2593203)
Supplement: supp_190_24_8096__1.pdf [file supp_190_24_8096__1.pdf]

**Supplemental Table 1.** Primers used in this study.

| Primer Names<br>(paired as used)                 | PCR Product/Description                                                                                                                                                                                                                                                     | Primer Sequences <sup>a</sup>                                                                        |
|--------------------------------------------------|-----------------------------------------------------------------------------------------------------------------------------------------------------------------------------------------------------------------------------------------------------------------------------|------------------------------------------------------------------------------------------------------|
| <b><u>psmC (Hvo 2923):</u></b>                   |                                                                                                                                                                                                                                                                             |                                                                                                      |
| 02057-BamHI Forward<br>02057-HindIII Reverse     | ~500 bp of genomic DNA flanking 5' and 3' of <i>psmC</i> generated using <i>H. volcanii</i> DS70 genomic DNA as a template; includes BamHI and HindIII sites for cloning into pTA131 to generate pJAM2024                                                                   | 5'-ACTGATGGATCCGGTTCGTGGGAGGTGTTTCGTCG-3'<br>5'-TGACTGCAAGCTTGGCTTCGGTGTCTCGTCGG-3'                  |
| 02057-Inverse Forward<br>02057-Inverse Reverse   | <i>psmC</i> -suicide plasmid pJAM2025 generated by inverse PCR using pJAM2024 as template                                                                                                                                                                                   | 5'-CGACGAGACGGACGAACGCGAGGAGTAGATGACAGACG-3'<br>5'-CTGCTTGTCTGTTTCGGTTCATCGTGCGACCTCCTCG-3'          |
| 02057-Negative-Forward<br>02057-Negative-Reverse | ~500 bp within <i>psmC</i> coding region; used to screen $\Delta$ <i>psmC</i> mutants                                                                                                                                                                                       | 5'-CCCCGACGGACGCATCTATCAGGTC-3'<br>5'-GAGATTCAGTTCGTCTCGCTCTCG-3'                                    |
| 02057-Confirm-Forward<br>02057-Confirm-Reverse   | ~700 bp of genomic DNA flanking 5' and 3' of <i>psmC</i> ; used to confirm $\Delta$ <i>psmC</i> mutation by PCR                                                                                                                                                             | 5'-CCTCGGCACCTGGGAGTCGAACGGC-3'<br>5'-CGGTCGAACAGGTGGTCTCCAGAACG-3'                                  |
| 02057-Inverse Forward<br>02057-HindIII Reverse   | ~500 bp probe 2057, generated using pJAM2024 as template, used to confirm $\Delta$ <i>psmC</i> mutation by Southern blot                                                                                                                                                    | 5'-CGACGAGACGGACGAACGCGAGGAGTAGATGACAGACG-3'<br>5'-TGACTGCAAGCTTGGCTTCGGTGTCTCGTCGG-3'               |
| <b><u>psmA (Hvo 1091):</u></b>                   |                                                                                                                                                                                                                                                                             |                                                                                                      |
| 00857-BamHI Forward<br>00857-HindIII Reverse     | ~500 bp of genomic DNA flanking 5' and 3' of <i>psmA</i> generated using <i>H. volcanii</i> DS70 genomic DNA as a template; includes BamHI and HindIII sites for cloning into pTA131 to generate pJAM2027                                                                   | 5'-ACTAATGGATCCCAAACACCTCCGGCCGC-3'<br>5'-TGACTGCAAGCTTGGAACTCATCCGCGAGTCG-3'                        |
| 00857-Inverse Forward<br>00857-Inverse Reverse   | <i>psmA</i> -suicide plasmid pJAM2029 generated by inverse PCR using pJAM2027 as template                                                                                                                                                                                   | 5'-ACCGCGTCCCGCGGTTCCCGTTCTCGCGGTTCTTCTTCGAC-3'<br>5'-GGAATATCACTCGAAATCGAGTTGCGTCGCGCCCGTG-3'       |
| 00857-Negative-Forward<br>00857-Negative-Reverse | ~500 bp within <i>psmA</i> coding region; used to screen $\Delta$ <i>psmA</i> mutants                                                                                                                                                                                       | 5'-GCCGGATGGTCGACTCTATCAGG-3'<br>5'-GACAGCTCGACGAAGCGCTCCG-3'                                        |
| 00857-Confirm-Forward<br>00857-Confirm-Reverse   | ~700 bp of genomic DNA flanking 5' and 3' of <i>psmA</i> ; used to confirm $\Delta$ <i>psmA</i> mutation by PCR                                                                                                                                                             | 5'-CGCCGACGAGTGAACCTGACCCGATGAAACACCTG-3'<br>5'-GGCGTCCGCGTCGTCTCAACGTC-3'                           |
| 00857-BamHI Forward<br>00857-Inverse Reverse     | ~500 bp probe 857, generated using pJAM2027 as template, used to confirm $\Delta$ <i>psmA</i> mutation by Southern blot                                                                                                                                                     | 5'-ACTAATGGATCCCAAACACCTCCGGCCGC-3'<br>5'-GGAATATCACTCGAAATCGAGTTGCGTCGCGCCCGTG-3'                   |
| <b><u>panA (Hvo 0850) :</u></b>                  |                                                                                                                                                                                                                                                                             |                                                                                                      |
| 01103-BamHI Forward<br>01103- Inverse Reverse    | ~500 bp of genomic DNA flanking 5' of <i>panA</i> generated using <i>H. volcanii</i> DS70 genomic DNA as a template; includes BamHI site used for three-way cloning with the ~500 bp fragment 3' of <i>panA</i> (see below) and pTA131 to generate suicide plasmid pJAM2026 | 5'-ACTATGGATCCGGGAGTCGACCGCGCCCTCGTCTTCCAGTCG-3'<br>5'-CCGGCATAGGGTGCAGGTTTCATAAGAGGCTTCGGGTGTGTG-3' |
| 01103-Inverse Forward                            | ~500 bp of genomic DNA flanking 3' of <i>panA</i> generated using <i>H.</i>                                                                                                                                                                                                 | 5'-CCGACGCGAGCCGCGGTTTCGCTCCGTTTCGGACCGTGTCC-3'                                                      |

| Primer Names<br>(paired as used)                 | PCR Product/Description                                                                                                                                                                                   | Primer Sequences <sup>a</sup>                                                                        |
|--------------------------------------------------|-----------------------------------------------------------------------------------------------------------------------------------------------------------------------------------------------------------|------------------------------------------------------------------------------------------------------|
| 01103-HindIII Reverse                            | <i>volcanii</i> DS70 genomic DNA as a template; includes HindIII site used for three-way cloning with the ~500 bp fragment 5' of <i>panA</i> (see above) and pTA131 to generate suicide plasmid pJAM2026  | 5'-ACTGCAAGCTTCTCGAACAGCTCCGCGGTGACCTTGTGACGC-3'                                                     |
| 01103-Negative-Forward<br>01103-Negative-Reverse | ~500 bp within <i>panA</i> coding region; used to screen $\Delta$ <i>panA</i> mutants                                                                                                                     | 5'-CGTCGCAGCAGGAGAAGATCACCG-3'<br>5'-GATGCCGACCTCAGCGAACATCTC-3'                                     |
| 01103-Confirm-Forward<br>01103-Confirm-Reverse   | ~700 bp of genomic DNA flanking 5' and 3' of <i>panA</i> ; used to confirm $\Delta$ <i>panA</i> mutation by PCR                                                                                           | 5'-GACATCGTCGGGAGCGGGCGAAGACATACGG-3'<br>5'-CCTCGCCGTCGTGTTTCTCGATGATGTCCGC-3'                       |
| 01103-BamHI Forward<br>01103-Inverse Reverse     | ~500 bp probe 1103, generated using pJAM2026 as template, used to confirm $\Delta$ <i>panA</i> mutation by Southern blot                                                                                  | 5'-ACTATGGATCCGGGAGTCGACCGCGCCCTCGTCTTCCAGTCG-3'<br>5'-CCGGCATAGGGTGCAGGTTTCATAAGAGGCTTCGGGTGTGTG-3' |
| <b><u>panB (Hvo 1957) :</u></b>                  |                                                                                                                                                                                                           |                                                                                                      |
| 03059-BamHI Forward<br>03059-HindIII Reverse     | ~500 bp of genomic DNA flanking 5' and 3' of <i>panB</i> generated using <i>H. volcanii</i> DS70 genomic DNA as a template; includes BamHI and HindIII sites for cloning into pTA131 to generate pJAM2022 | 5'-ACTGATGGATCCTACGACGGCAGCTATCAGG-3'<br>5'-TAACTTAAGCTTCGTGCGTGCCGGTGGTGAGC-3'                      |
| 03059-Inverse Forward<br>03059- Inverse Reverse  | <i>panB</i> -suicide plasmid pJAM2023 generated by inverse PCR using pJAM2022 as template                                                                                                                 | 5'-GGCTTACGGACTACCAGTACTGAGGTCCG-3'<br>5'-CCGGAACGTCCTCATCTCGATCTGGACCC-3'                           |
| 03059-Negative-Forward<br>03059-Negative-Reverse | ~500 bp within <i>panB</i> coding region; used to screen $\Delta$ <i>panB</i> mutants                                                                                                                     | 5'-CTCCAGAACGCCGATGACCGCCACG-3'<br>5'-CGATGCCGACCTCAGCGAACATCTC-3'                                   |
| 03059-Confirm-Forward<br>03059-Confirm-Reverse   | ~700 bp of genomic DNA flanking 5' and 3' of <i>panB</i> ; used to confirm $\Delta$ <i>panB</i> mutation by PCR                                                                                           | 5'-CTCATGCGGAACCTCCTGTATGCTGAACACGG-3'<br>5'-CAGGACGACGAACAGCCATCCCTCACCG-3'                         |
| 03059-BamHI Forward<br>03059-Inverse Reverse     | ~500 bp probe 3059, generated using pJAM2022 as template, used to confirm $\Delta$ <i>panB</i> mutation by Southern blot                                                                                  | 5'-ACTGATGGATCCTACGACGGCAGCTATCAGG-3'<br>5'-CCGGAACGTCCTCATCTCGATCTGGACCC-3'                         |
| <b><u>psmB (Hvo 1562) :</u></b>                  |                                                                                                                                                                                                           |                                                                                                      |
| 00375-BamHI Forward<br>00375-HindIII Reverse     | ~500 bp of genomic DNA flanking 5' and 3' of <i>psmB</i> generated using <i>H. volcanii</i> DS70 genomic DNA as a template; includes BamHI and HindIII sites for cloning into pTA131 to generate pJAM2030 | 5'-TGACGAGGATCCGAATTCGCGACGCTCC-3'<br>5'-TGACTGCAAGCTTCTCACC GCGCTCTGGATGG-3'                        |
| 00375-Inverse Forward<br>00375- Inverse Reverse  | <i>psmB</i> -suicide plasmid pJAM2031 generated by inverse PCR using pJAM2030 as template                                                                                                                 | 5'-GTCGACATCCAGCGCCACCAGAACTTCGAAGGC-3'<br>5'-CGGAGACAATGCGTACCCGACTCAGACG-3'                        |
| 00375-Negative-Forward<br>00375-Negative-Reverse | ~500 bp within <i>psmB</i> coding region; used to screen $\Delta$ <i>psmB</i> mutants                                                                                                                     | 5'-AGTTCTCCGGCCGTCTCGACTCGCTG-3'<br>5'-CGACTCCCTTCGCTCCTCGATGCTG-3'                                  |
| 00375-Confirm-Forward<br>00375-Confirm-Reverse   | ~700 bp of genomic DNA flanking 5' and 3' of <i>psmB</i> ; used to confirm $\Delta$ <i>psmB</i> mutation by PCR                                                                                           | 5'-CGCCGACTTCGACCTCGACGTA CTCTTGTCC-3'<br>5'-CTCGAAGGCGGTTCTCGACTGGTTCTGACG-3'                       |

| Primer Names<br>(paired as used)                       | PCR Product/Description                                                                                                                                                                              | Primer Sequences <sup>a</sup>                                                              |
|--------------------------------------------------------|------------------------------------------------------------------------------------------------------------------------------------------------------------------------------------------------------|--------------------------------------------------------------------------------------------|
| 00375-BamHI Forward<br>00375-Inverse Reverse           | ~500 bp probe 375, generated using pJAM2030 as template, used to confirm $\Delta psmB$ mutation by Southern blot                                                                                     | 5'-TGACGAGGATCCGAATTCGCGACGCTCC-3'<br>5'-CGGAGACAATGCGTACCCCGACTCACGACG-3'                 |
| <b><u>P<sub>maA</sub> promoter fusions:</u></b>        |                                                                                                                                                                                                      |                                                                                            |
| XbaI_P <sub>maA</sub> up<br>NdeI_P <sub>maA</sub> down | 337-bp P <sub>maA</sub> promoter generated using <i>H. volcanii</i> DS70 genomic DNA as a template; includes XbaI and NdeI sites for cloning into pJAM202 and pJAM204                                | 5'-GCTCTAGAACGACGCCATCACCTCC-3'<br>5'-ACGATTTCATATGGCCCGCAATAGGTCCG-3'                     |
| XbaI_P <sub>maA-psmA</sub><br>00857-Confirm-Forward    | 531-bp flanking 5' of <i>psmA</i> generated using <i>H. volcanii</i> DS70 genomic DNA as a template; includes XbaI site for cloning to generate pTA131-derived P <sub>maA-psmA</sub> suicide plasmid | 5'-TGTTGTTGCGCTTGTCGTCTAGAGGAATATCACTCGAAATC-3'<br>5'-CGCCGACGAGTGAAGTACCCGATGAAACACCTG-3' |
| SpeI_P <sub>maA-psmB</sub><br>00375-Confirm-Forward    | 834-bp flanking 5' of <i>psmB</i> generated using <i>H. volcanii</i> DS70 genomic DNA as a template; includes SpeI site for cloning to generate pTA131-derived P <sub>maA-psmB</sub> suicide plasmid | 5'-GGCCACTAGTTGTCTCCGATTGCACTTCG-3'<br>5'-CCTCGGCACCTGGGAGTCGAACGGC-3'                     |
| 00857-Confirm-Forward<br>00857-Negative-Reverse        | ~1.1 kb of genomic DNA flanking 5' and within <i>psmA</i> ; used to confirm insertion of P <sub>maA</sub> upstream of <i>psmA</i> by PCR                                                             | 5'-CGCCGACGAGTGAAGTACCCGATGAAACACCTG-3'<br>5'-GACAGCTCGACGAAGCGTCCG-3'                     |
| 00375-Confirm-Forward<br>00375-Negative-Reverse        | ~1.4 kb of genomic DNA flanking 5' and within <i>psmB</i> ; used to confirm insertion of P <sub>maA</sub> upstream of <i>psmB</i> by PCR                                                             | 5'-CGCCGACTTCGACCTCGACGTA CTCTTGTCC-3'<br>5'-CGACTCCCTTCGCCTCCTCGATGCTG-3'                 |

<sup>a</sup>Restriction sites are underlined.

**Supplemental Table 2.** Summary of chromosomal knockout and P<sub>maA</sub> promoter fusion mutant strains of 20S proteasome and proteasome-activating nucleotidase genes as confirmed by PCR and Southern blot analyses.

| Mutant Strain no. | Probe no. <sup>a</sup> | Mutant Strain Genotype                    | PCR (bp) <sup>b</sup> |                   | Southern Blot (bp) |                   | Difference (bp) |
|-------------------|------------------------|-------------------------------------------|-----------------------|-------------------|--------------------|-------------------|-----------------|
|                   |                        |                                           | Parent vs. Mutant     | Parent vs. Mutant | Parent vs. Mutant  | Parent vs. Mutant |                 |
| GZ108             | 3059                   | H26 $\Delta$ panB                         | 2628                  | 1463              | 2702               | 1537              | 1165            |
| GZ109             | 1103                   | H26 $\Delta$ panA                         | 2366                  | 1145              | 2362               | 1141              | 1221            |
| GZ114             | 2057                   | H26 $\Delta$ psmC                         | 2064                  | 1363              | 2307               | 1606              | 701             |
| GZ120             | 3059                   | GZ114 $\Delta$ psmC $\Delta$ panB         | 2628                  | 1463              | 2702               | 1537              | 1165            |
| GZ130             | 857                    | H26 $\Delta$ psmA                         | 2209                  | 1450              | 1873               | 1114              | 759             |
| GZ131             | 1103                   | GZ114 $\Delta$ psmC $\Delta$ panA         | 2366                  | 1145              | 2362               | 1141              | 1221            |
| GZ132             | 1103                   | GZ108 $\Delta$ panB $\Delta$ panA         | 2366                  | 1145              | 2362               | 1141              | 1221            |
| GZ133             | 857                    | GZ108 $\Delta$ panB $\Delta$ psmA         | 2209                  | 1450              | 1873               | 1114              | 759             |
| GZ134             | 1103                   | GZ130 $\Delta$ psmA $\Delta$ panA         | 2366                  | 1145              | 2362               | 1141              | 1221            |
| GZ136             | 857                    | H26 P <sub>maA</sub> -psmA                | 1190                  | 1513              | 1873               | 2196              | -323            |
| GZ137             | 857                    | H26 $\Delta$ psmC -P <sub>maA</sub> -psmA | 1190                  | 1513              | 1873               | 2196              | -323            |
| GZ138             | 375                    | H26 P <sub>maA</sub> -psmB                | 1431                  | 1790              | 2160               | 2519              | -359            |
| GZ112             | 375                    | H26 $\Delta$ psmB (pJAM202)               | 2215                  | 1547              | 2160               | 1492              | 668             |

<sup>a</sup>Probe number used in Southern blot.

<sup>b</sup>Molecular size (bp) of DNA fragments generated by PCR and Southern blot for parent and mutant strains as calculated *in silico* from the *H. volcanii* genome sequence (<http://archaea.ucsc.edu/>; April 2007 version). Difference in the anticipated size of DNA fragments for parent and mutant strains is also presented. Calculations for PCR were based on amplification using “Confirm-Forward” and “Confirm-Reverse” primer pairs (Suppl. Table 1) which anneal upstream and downstream (outside) of the DNA sequences cloned in the suicide plasmid used for homologous recombination for each respective gene mutation.

**Supplemental Table 3.** Frequency of isolating *Hfx. volcanii* mutant strains with a marker-less deletion in the proteasomal gene of interest using the ‘pop-in/pop-out’ method.

| Strain no.        | Genotype                            | Proteasome Genes Deleted or Modified <sup>a</sup>  | Proteasome Protein Deficiency <sup>b</sup> | Knockout Frequency <sup>c</sup> |
|-------------------|-------------------------------------|----------------------------------------------------|--------------------------------------------|---------------------------------|
| GZ130             | H26 <i>psmA</i>                     | $\Delta$ <i>psmA</i>                               | $\alpha$ 1                                 | 5.6% (6/108)                    |
| GZ114             | H26 <i>psmC</i>                     | $\Delta$ <i>psmC</i>                               | $\alpha$ 2                                 | 2.4% (1/41)                     |
| GZ109             | H26 <i>panA</i>                     | $\Delta$ <i>panA</i>                               | PanA                                       | 14.0% (8/57)                    |
| GZ108             | H26 <i>panB</i>                     | $\Delta$ <i>panB</i>                               | PanB                                       | 1.6% (1/60)                     |
| N.A. <sup>d</sup> | H26 <i>psmB</i>                     | $\Delta$ <i>psmB</i>                               | $\beta$                                    | 0% (0/205)                      |
| GZ112             | H26 <i>psmB</i> -<br><i>pJAM202</i> | $\Delta$ <i>psmB</i> + <i>psmB</i> <i>in trans</i> | $\beta$                                    | 7.1% (3/42)                     |
| GZ120             | GZ114 <i>panB</i>                   | $\Delta$ <i>psmC</i> $\Delta$ <i>panB</i>          | $\alpha$ 2, PanB                           | 11.7% (7/60)                    |
| GZ131             | GZ114 <i>panA</i>                   | $\Delta$ <i>psmC</i> $\Delta$ <i>panA</i>          | $\alpha$ 2, PanA                           | 15.8% (9/57)                    |
| GZ132             | GZ108 <i>panA</i>                   | $\Delta$ <i>panB</i> $\Delta$ <i>panA</i>          | PanA, PanB                                 | 1.9% (1/52)                     |
| GZ133             | GZ108 <i>psmA</i>                   | $\Delta$ <i>panB</i> $\Delta$ <i>psmA</i>          | $\alpha$ 1, PanB                           | 2.9% (3/103)                    |
| GZ134             | GZ130 <i>panA</i>                   | $\Delta$ <i>psmA</i> $\Delta$ <i>panA</i>          | $\alpha$ 1, PanA                           | 1.9% (1/53)                     |
| N.A.              | GZ114 <i>psmA</i>                   | $\Delta$ <i>psmC</i> $\Delta$ <i>psmA</i>          | $\alpha$ 1, $\alpha$ 2                     | 0% (0/252)                      |
| N.A.              | GZ130 <i>psmC</i>                   | $\Delta$ <i>psmA</i> $\Delta$ <i>psmC</i>          | $\alpha$ 1, $\alpha$ 2                     | 0% (0/100)                      |
| GZ136             | H26 $P_{maA}$ - <i>psmA</i>         | $P_{maA}$ - <i>psmA</i>                            | $\alpha$ 1                                 | 4.3% (2/46)                     |
| GZ137             | GZ114 $P_{maA}$ - <i>psmA</i>       | $\Delta$ <i>psmC</i> $P_{maA}$ - <i>psmA</i>       | $\alpha$ 1, $\alpha$ 2                     | 2.6% (4/156)                    |
| GZ138             | H26 $P_{maA}$ - <i>psmB</i>         | $P_{maA}$ - <i>psmB</i>                            | $\beta$                                    | 7.2% (11/152)                   |

<sup>a</sup>Gene deletions ( $\Delta$ ),  $P_{maA}$  promoter fusions ( $P_{maA}$ -) and/or replicating plasmid pJAM202 provided in trans as indicated.

<sup>b</sup> $\alpha$ 1,  $\alpha$ 2 and  $\beta$ , 20S proteasome core particle subunits; PanA and PanB, proteasome-activating nucleotidase proteins.

<sup>c</sup>Frequency of clones isolated with targeted gene deleted on the *Hfx. volcanii* genome represented as percent of total with number of clones isolated per total screened in parenthesis.

<sup>d</sup>N.A., not applicable. Target gene was not deleted from parent strain.
